# Supplementary material for: Ether and siloxane functionalized ionic liquids and their mixtures as electrolyte for lithium-ion batteries
Source: Royal Society of Chemistry journal article supplement (doi:10.1039/c6cp01519k), 2016-01-01
Supplement: c6cp01519k1.pdf [file c6cp01519k1.pdf]

## **Supporting Information**

### **Ether and Siloxane Functionalized Ionic Liquid Mixtures as Electrolyte for Lithium-ion Batteries**

Santosh N. Chavan, Aarti Tiwari, Tharamani C. Nagaiah\* and Debaprasad Mandal\*

*Department of Chemistry, Indian Institute of Technology Ropar, Rupnagar, Punjab-140001, India.*

Corresponding author. *E-mail address:* [dmandal@iitrpr.ac.in](mailto:dmandal@iitrpr.ac.in)

**Table S1.** Electrochemical stability window of various electrolytes at different temperatures.

| Electrolytes                 | Electrochemical stability window (V) |      |      |       |      |      |       |      |      |       |      |      |       |      |      |
|------------------------------|--------------------------------------|------|------|-------|------|------|-------|------|------|-------|------|------|-------|------|------|
|                              | 10 °C                                |      |      | 25 °C |      |      | 40 °C |      |      | 50 °C |      |      | 60 °C |      |      |
|                              | CL                                   | AL   | ESW  | CL    | AL   | ESW  | CL    | AL   | ESW  | CL    | AL   | ESW  | CL    | AL   | ESW  |
| Ether-ether IL               | -2.89                                | 1.87 | 4.76 | -3.08 | 1.98 | 5.06 | -3.09 | 1.99 | 5.08 | -2.91 | 2.07 | 4.98 | -2.84 | 1.92 | 4.76 |
| Ether-ether IL + PC          | -2.96                                | 1.86 | 4.82 | -2.97 | 1.83 | 4.80 | -2.95 | 1.67 | 4.62 | -2.94 | 1.74 | 4.68 | -2.95 | 1.80 | 4.75 |
| Ether-ether IL + PC + LiTFSI | -3.61                                | 2.03 | 5.64 | -3.47 | 2.48 | 5.95 | -3.32 | 2.37 | 5.69 | -3.33 | 2.30 | 5.63 | -3.19 | 2.27 | 5.46 |
| Ether-siloxane IL            | -3.15                                | 2.40 | 5.55 | -3.07 | 2.48 | 5.55 | -3.10 | 2.45 | 5.55 | -3.01 | 2.37 | 5.38 | -2.99 | 2.24 | 5.23 |
| Ether-siloxane + PC          | -3.30                                | 2.61 | 5.91 | -3.16 | 2.59 | 5.75 | -3.09 | 2.55 | 5.64 | -3.29 | 2.51 | 5.80 | -3.19 | 2.47 | 5.66 |
| Ether-siloxane + PC + LiTFSI | -2.00                                | 2.06 | 4.06 | -2.01 | 2.20 | 4.21 | -2.00 | 2.17 | 4.17 | -1.91 | 2.13 | 4.04 | -1.91 | 2.09 | 4.00 |

AL : Anodic Limit

CL : Cathodic Limit

ESW : Electrochemical Stability Window

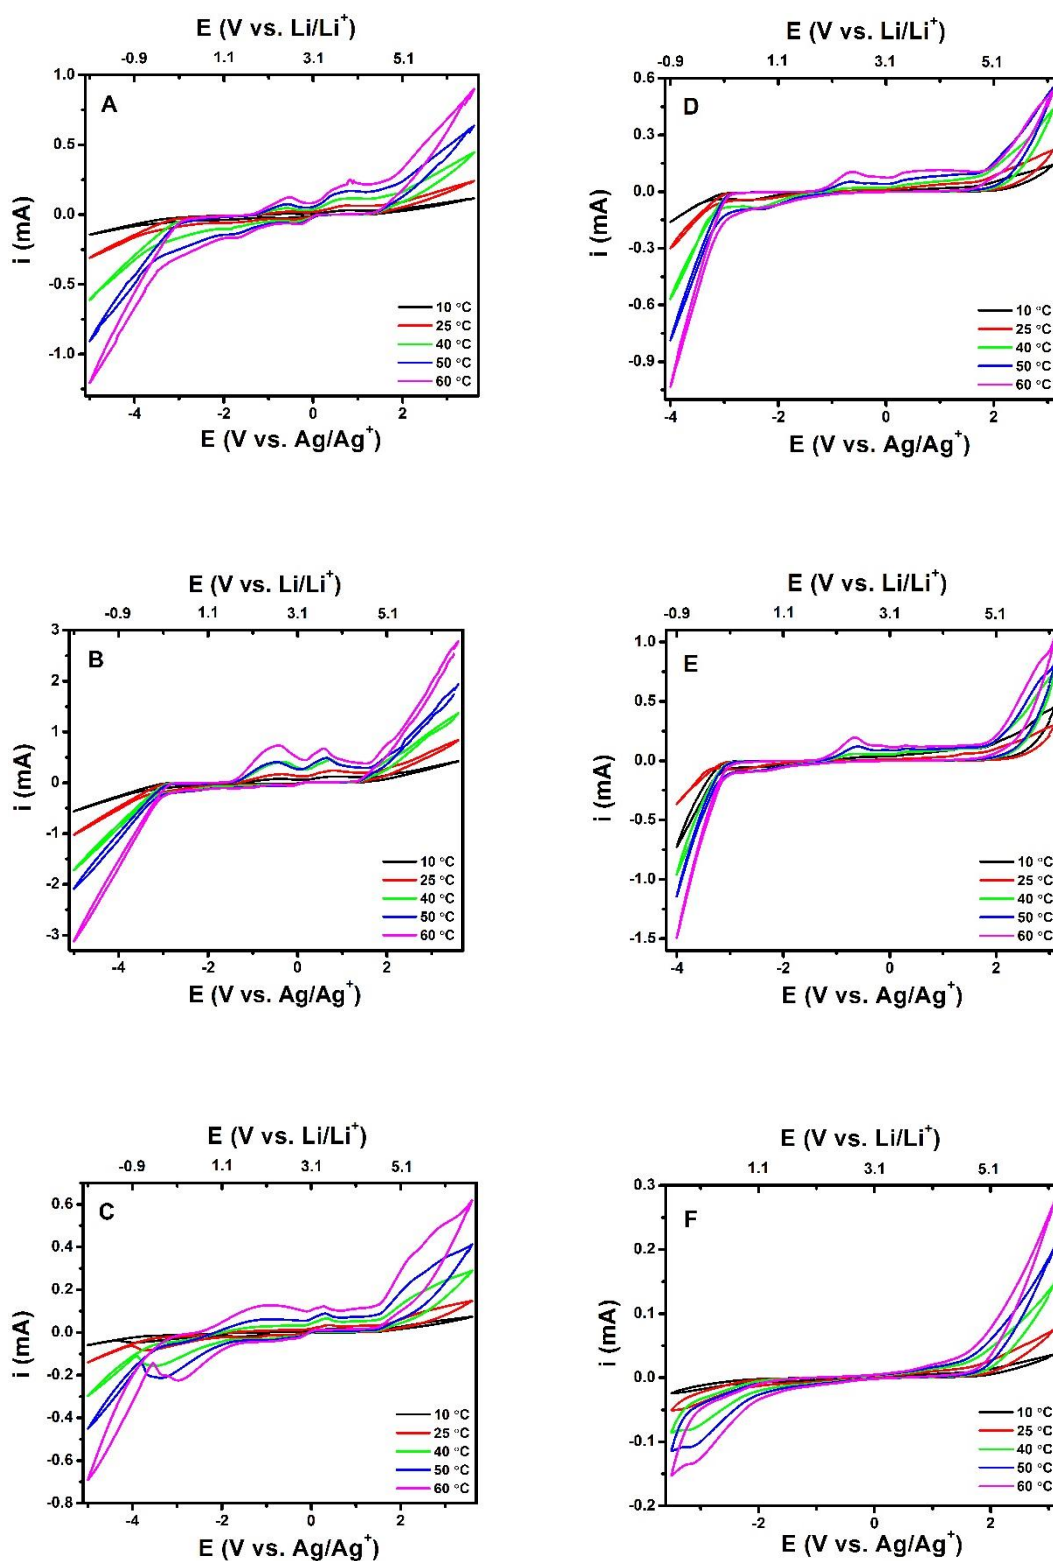

**Figure S1.** Cyclic voltammograms with varying temperatures for (A) ether-ether IL, (IL + PC) and (IL + PC + LiTFSI); (B) ether-siloxane IL, (IL + PC) and (IL + PC + LiTFSI) at a sweep rate of 50 mV/s, WE: glassy carbon (GC), CE: graphite rod, RE: Ag/Ag<sup>+</sup>/PC.

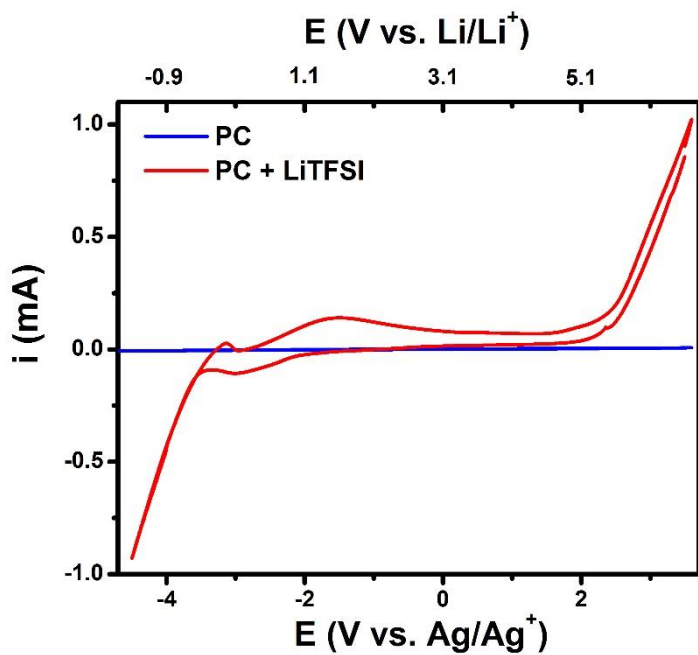

**Figure S2.** Cyclic voltammogram for propylene carbonate (PC) and PC with LiTFSI salt at a sweep rate of 50 mV/s, WE: glassy carbon (GC), CE: graphite rod, RE: Ag/Ag<sup>+</sup>/PC.

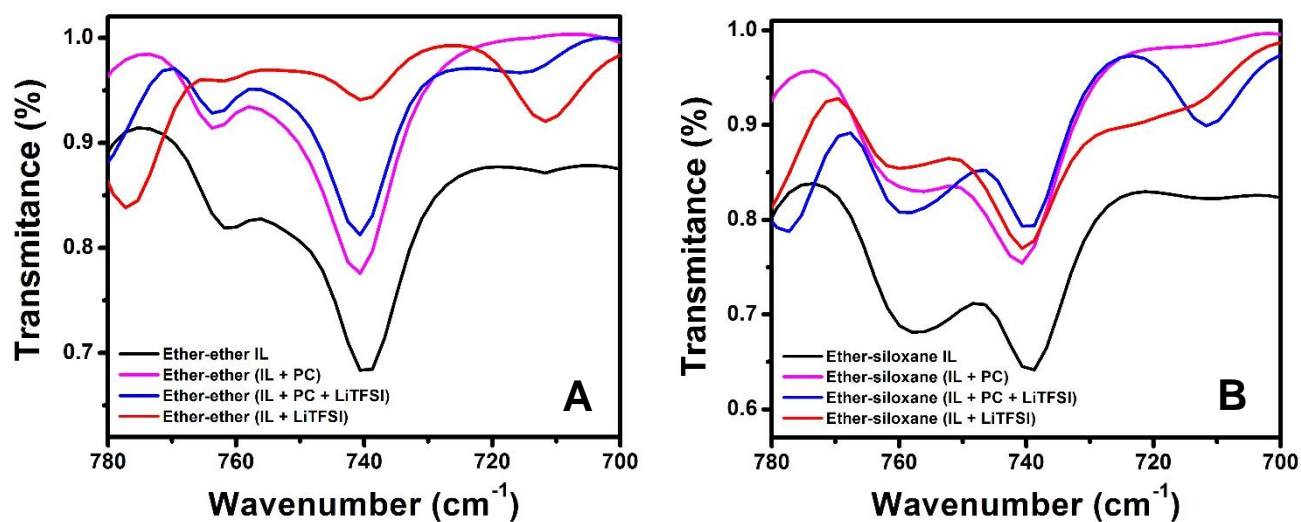

**Figure S3.** IR spectra of (A) ether-ether IL and (B) ether-siloxane IL and their respective composites.

| <b>Table S2.</b> SNS stretching from TFSI Stretching frequencies in IR of electrolyte sample |                |       |        |           |              |
|----------------------------------------------------------------------------------------------|----------------|-------|--------|-----------|--------------|
| Vibrational modes                                                                            | Electrolytes   | IL    | IL+PC  | IL+LiTFSI | IL+PC+LiTFSI |
| $\nu_{S-N-S}$                                                                                | Ether-Ether    | 788.5 | 777.0  | 791.5     | 787.8        |
|                                                                                              | Ether-Siloxane | 789.0 | 777.0  | 794.0     | 787.0        |
| $\nu_{C=O}^{[a]}$                                                                            | Ether-Ether    |       | 1788.0 |           | 1786.0       |
|                                                                                              | Ether-Siloxane |       | 1791.8 |           | 1786.0       |

[a]  $\nu_{C=O}$  for PC appears at 1786  $\text{cm}^{-1}$

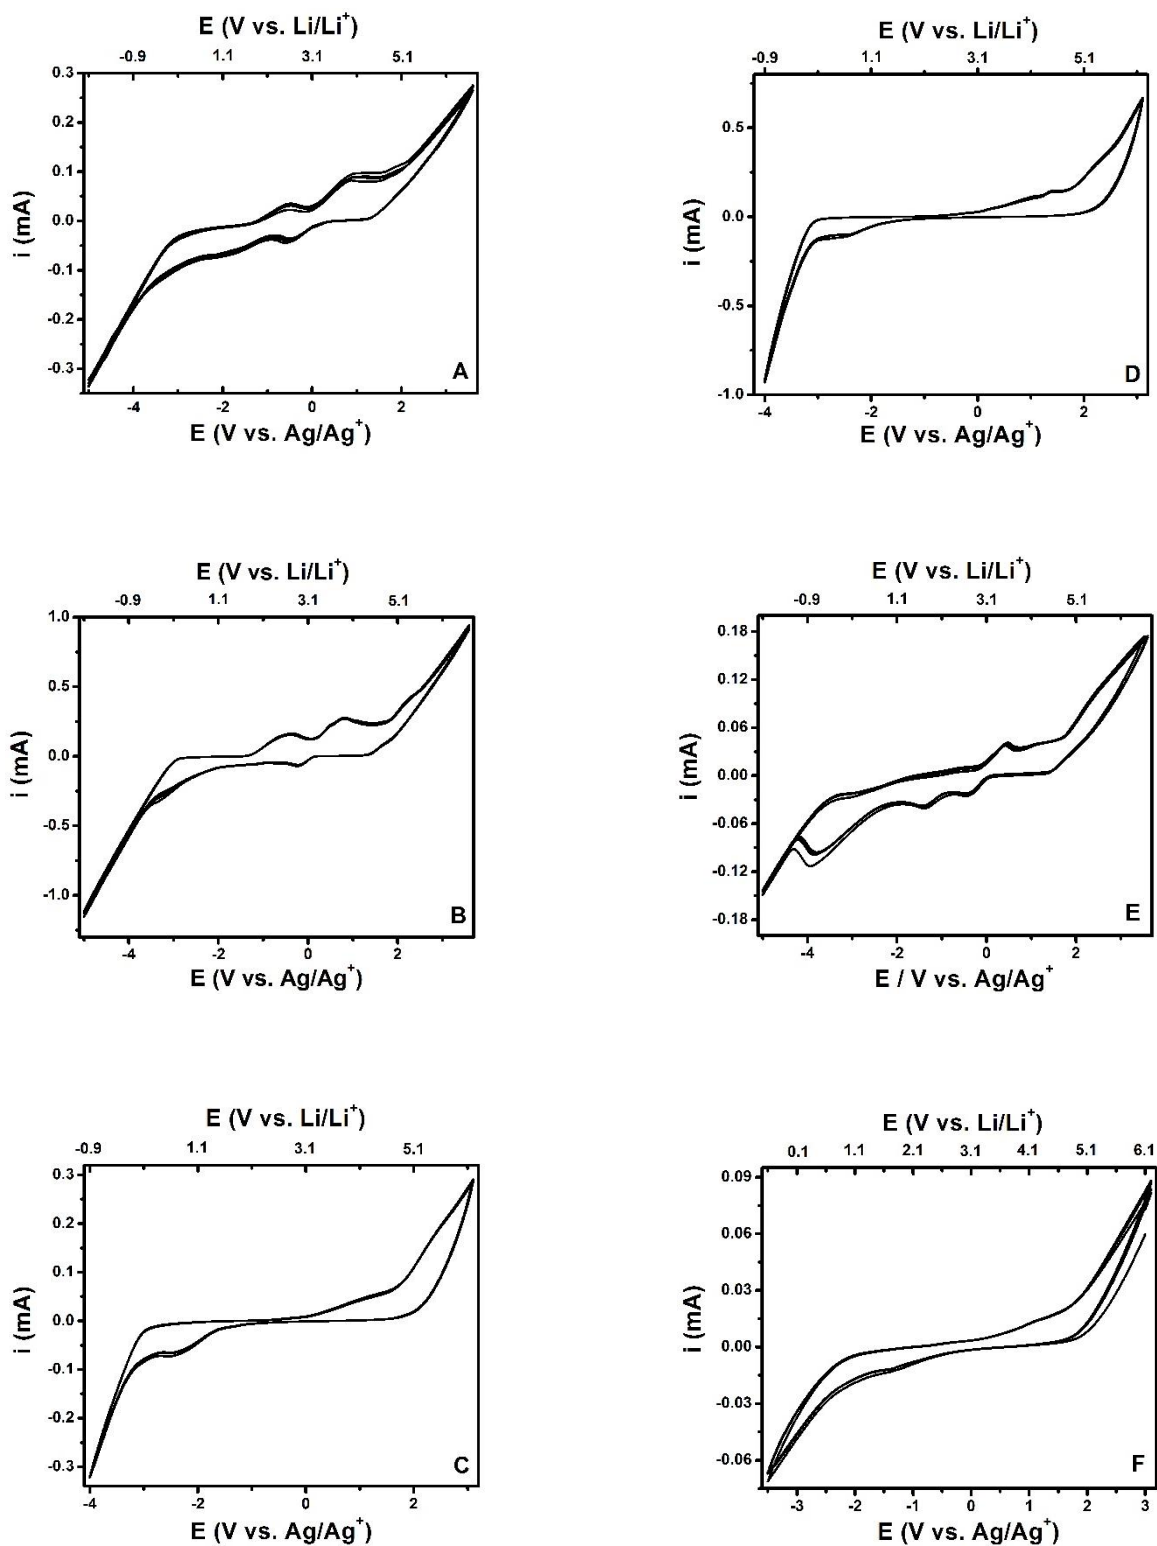

**Figure S4.** Cyclic voltammograms depicting nature of ILs after 10 cycles with varying temperatures for (A) ether-ether IL, (B) ether-ether (IL+ PC), (C) ether-siloxane IL, (D) ether-siloxane (IL + PC), (E) ether-ether (IL+ PC + LiTFSI) and (F) ether-siloxane (IL + PC + LiTFSI) at a sweep rate of 100 mV/s; WE: glassy carbon (GC), CE: graphite rod, RE:  $\text{Ag}/\text{Ag}^+/\text{PC}$ .

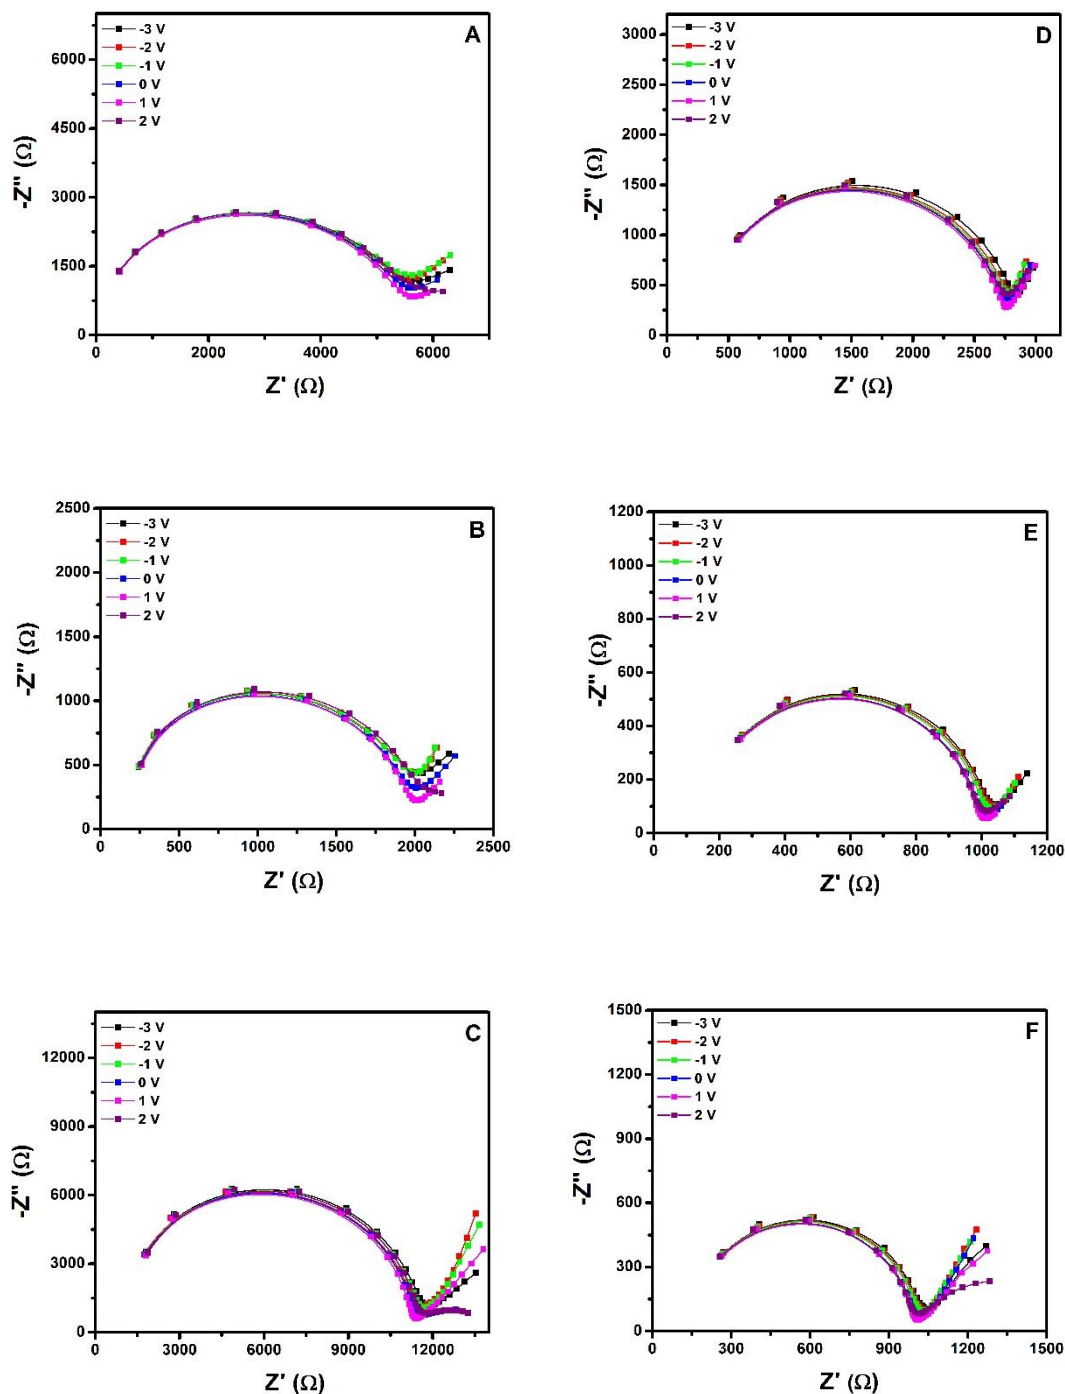

**Figure S5.** Impedance response with varying applied potential for (A) ether-ether IL; (B) ether-ether (IL + PC); (C) ether-ether (IL + PC + LiTFSI), performed in 50 mL jacketed glass cell ( $25.1 \text{ cm}^{-1}$  cell constant); and (D) ether-siloxane neat IL; (E) ether-siloxane (IL + PC); (F) ether-siloxane (IL + PC + LiTFSI), performed in 20 mL jacketed glass cell ( $7.07 \text{ cm}^{-1}$  cell constant) at  $25 \text{ }^\circ\text{C}$ , WE: glassy carbon (GC), CE: graphite rod, RE: Ag/Ag<sup>+</sup>/PC.

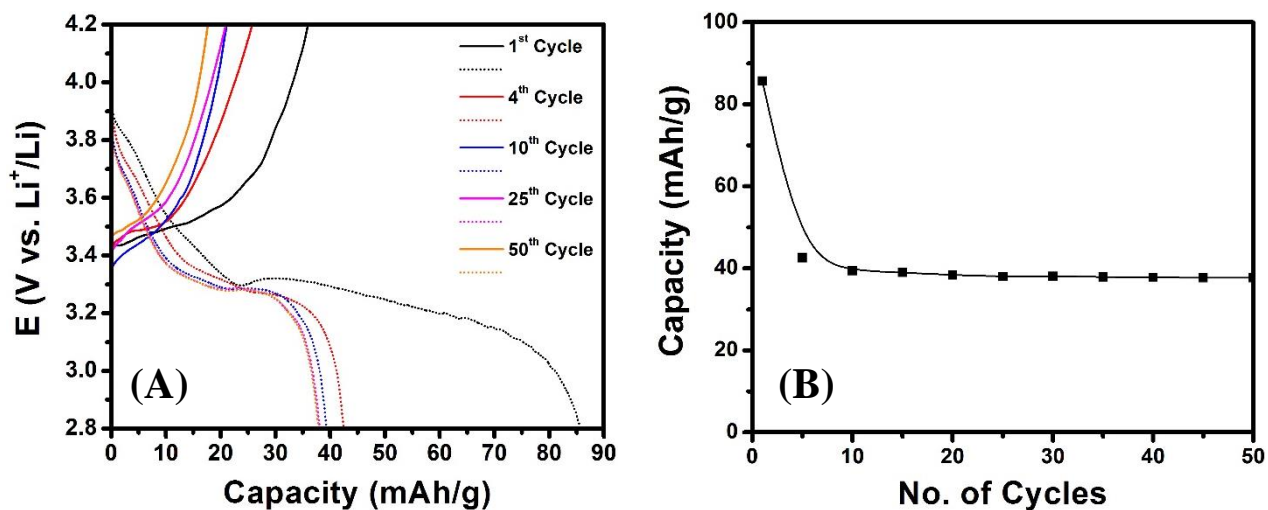

**Figure S6.** (A) Charge-discharge profile, and (B) Cycling discharge capacity for ether-ether IL solvent containing 1 mol of LiTFSI per kg electrolyte at 1C rate w.r.t the cathode for Li-ion cell.

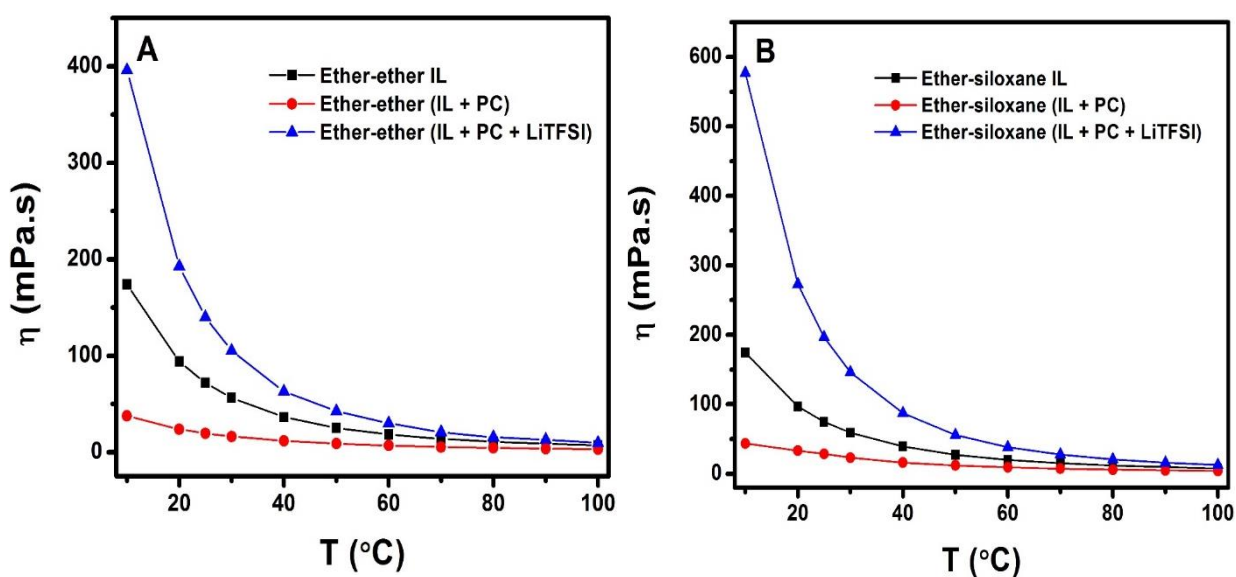

**Figure S7.** Temperature dependence of viscosity for various electrolytes (A) ether-ether IL, (IL + PC) and (IL + PC + LiTFSI); (B) ether-siloxane IL, (IL + PC) and (IL + PC + LiTFSI).



**Table S3.** Dynamic viscosity ( $\eta$  /mPa·s) at varying temperatures for ether-ether and ether-siloxane ILs.

| Temp. (°C) | Neat IL     |                | IL+PC       |                | IL+PC+LiTFSI |                |
|------------|-------------|----------------|-------------|----------------|--------------|----------------|
|            | ether-ether | ether-siloxane | ether-ether | ether-siloxane | ether-ether  | ether-siloxane |
| 10         | 174.10      | 174.28         | 37.48       | 43.58          | 396.04       | 577.33         |
| 20         | 94.02       | 96.97          | 23.81       | 33.23          | 192.73       | 272.93         |
| 25         | 71.98       | 74.71          | 19.51       | 28.66          | 140.03       | 196.77         |
| 30         | 56.36       | 59.22          | 16.27       | 23.18          | 105.08       | 146.06         |
| 40         | 36.49       | 39.23          | 11.77       | 16.07          | 62.94        | 87.18          |
| 50         | 25.19       | 27.35          | 8.91        | 11.97          | 42.59        | 55.89          |
| 60         | 18.34       | 20.01          | 6.88        | 9.25           | 30.03        | 38.43          |
| 70         | 13.88       | 15.21          | 5.38        | 7.33           | 20.65        | 27.82          |
| 80         | 10.85       | 11.92          | 4.37        | 5.95           | 15.46        | 20.89          |
| 90         | 8.70        | 9.58           | 3.65        | 4.93           | 12.86        | 15.79          |
| 100        | 7.14        | 7.67           | 3.11        | 4.17           | 9.66         | 12.51          |

**Table S4.** Thermal properties of ether-ether and ether-siloxane ILs derived from DSC measurements.

| Electrolytes                    | $T_g$ | First step       |                  |                 |                   | Second step      |                  |                 |                   |
|---------------------------------|-------|------------------|------------------|-----------------|-------------------|------------------|------------------|-----------------|-------------------|
|                                 |       | $T_{start}$ (°C) | $T_{onset}$ (°C) | $T_{peak}$ (°C) | $T_{endset}$ (°C) | $T_{start}$ (°C) | $T_{onset}$ (°C) | $T_{peak}$ (°C) | $T_{endset}$ (°C) |
| ether-ether IL                  | -74.5 | -                | -                | -               | -                 | 309.7            | 426.8            | 480.5           | 494.7             |
| ether-ether IL + PC             | -84.1 | 110.5            | 141.5            | 176.3           | 245.9             | 363.5            | 426.7            | 469.2           | 507.5             |
| ether-ether IL + PC + LiTFSI    | -81.2 | 150.6            | 153.1            | 204.6           | 255.5             | 369.3            | 436.1            | 467.1           | 512.1             |
| ether-ether + LiTFSI            | -73.0 | -                | -                | -               | -                 | 355.9            | 436.2            | 468.6           | 515.9             |
| ether-siloxane IL               | -72.3 | -                | -                | -               | -                 | 307.4            | 430.4            | 483.0           | 498.1             |
| ether-siloxane IL + PC          | -85.6 | 103.7            | 137.0            | 177.2           | 243.8             | 352.3            | 428.2            | 472.5           | 505.9             |
| ether-siloxane IL + PC + LiTFSI | -77.2 | 130.8            | 151.3            | 202.5           | 273.6             | 355.4            | 428.5            | 473.1           | 521.5             |
| ether-siloxane IL + LiTFSI      | -70.0 | -                | -                | -               | -                 | 329.0            | 429.8            | 472.2           | 510.6             |

**Table S5.** VTF parameters for the conductivity and viscosity of the ILs and their electrolyte mixtures (estimated maximum error  $\leq \pm 5\%$ )

| conductivity                 |                    |          |           |       | viscosity        |         |           |       |
|------------------------------|--------------------|----------|-----------|-------|------------------|---------|-----------|-------|
| ILs and electrolyte mixtures | $\sigma_0$ (mS/cm) | $B$ (K)  | $T_0$ (K) | $R^2$ | $\eta_0$ (mPa.s) | $B$ (K) | $T_0$ (K) | $R^2$ |
| Ether-ether IL               | 2334.69            | -850.66  | -162.04   | 0.999 | 0.216            | 659     | 184.4     | 1     |
| Ether-ether IL+PC            | 156.77             | -182.05  | -225.03   | 0.994 | 0.129            | 657.2   | 166.9     | 0.999 |
| Ether-ether IL+PC+LiTFSI     | 5.26E6             | -4535.94 | 10.72     | 0.999 | 0.213            | 706.1   | 189.1     | 0.999 |
| Ether-siloxane IL            | 103.78             | -378.47  | -195.60   | 0.998 | 0.232            | 679.7   | 180.2     | 0.999 |
| Ether-Siloxane IL+PC         | 85.46              | -240.82  | -198.92   | 0.993 | 3.357E-7         | 10561.2 | 281.7     | 0.995 |
| Ether-Siloxane IL+PC+LiTFSI  | 23.57              | -274.07  | -226.27   | 0.999 | 0.234            | 733.7   | 189.0     | 1     |

VTF equation for conductivity  $\sigma = \sigma_0 \exp\left(\frac{-B}{T-T_0}\right)$

VTF equation for the Viscosity  $\eta = \eta_0 \exp\left(\frac{B}{T-T_0}\right)$
